# Supplementary material for: Methyl-CpG binding domain 2 (Mbd2) is an Epigenetic Regulator of Autism-Risk Genes and Cognition
Source: bioRxiv or medRxiv preprint supplement (doi:10.1101/247197), 2020-10-27

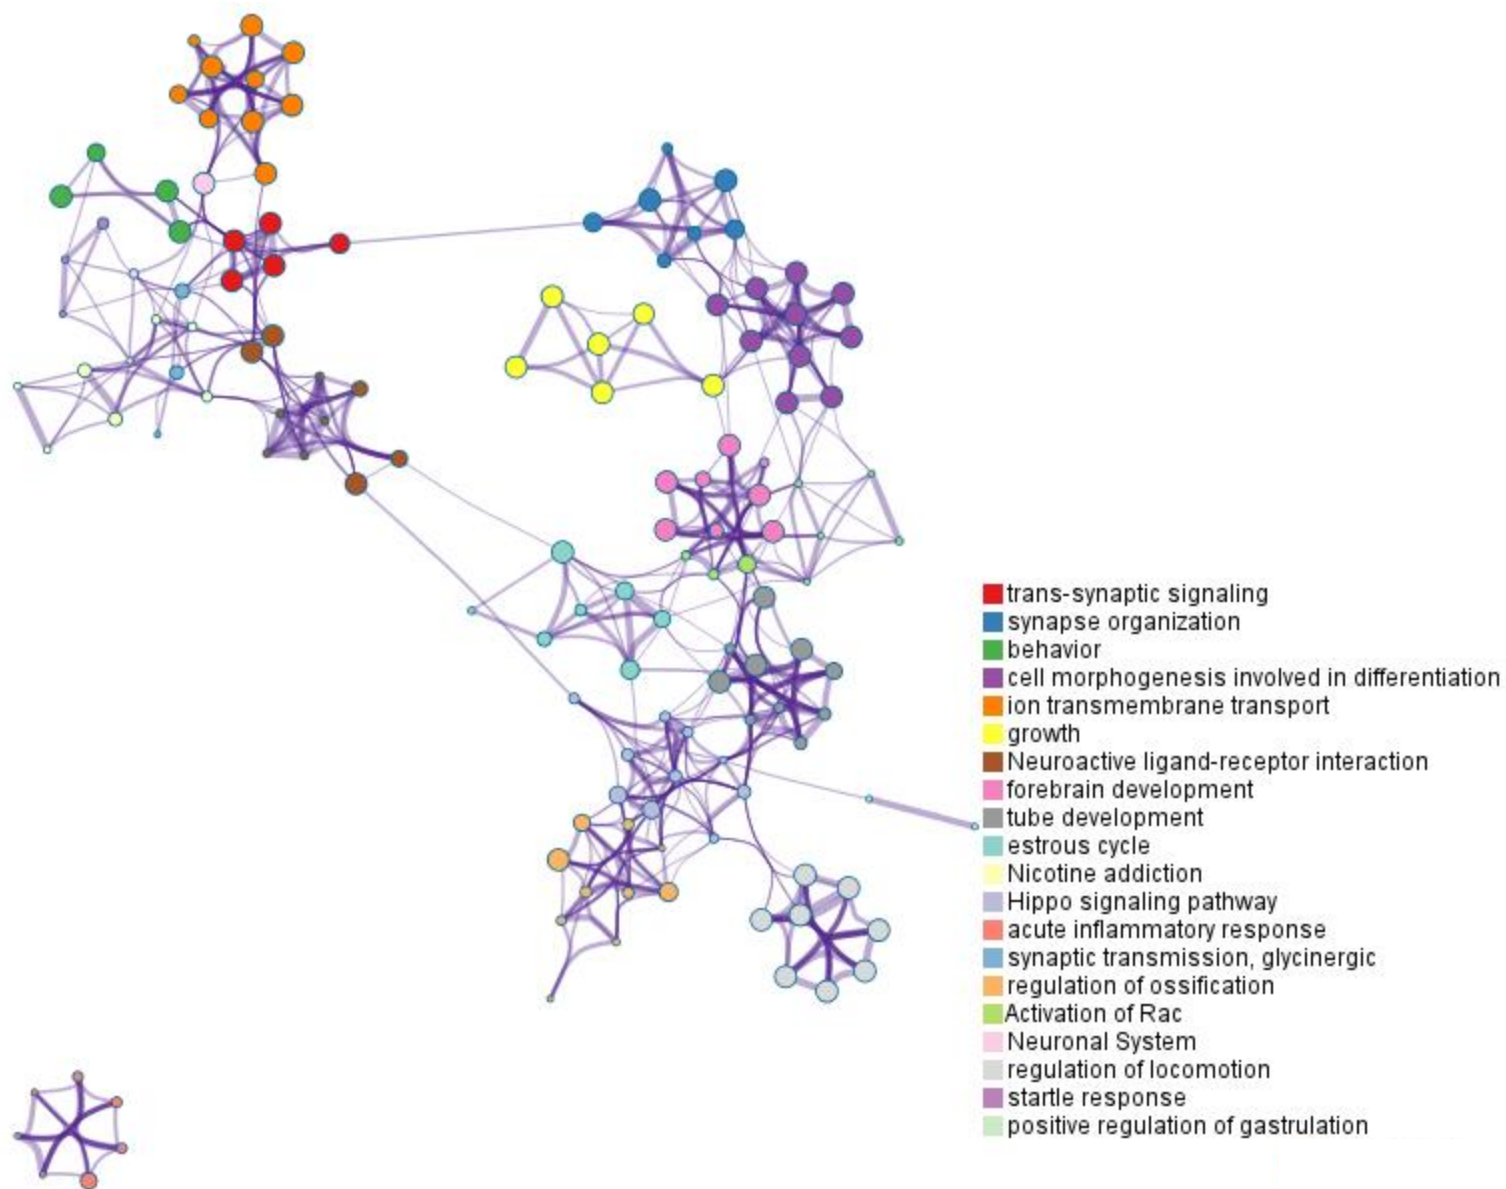

Supplement: Supplementary file [file 247197-3.pdf]
