# Supplementary material for: Methyl-CpG binding domain 2 (Mbd2) is an Epigenetic Regulator of Autism-Risk Genes and Cognition
Source: bioRxiv or medRxiv preprint supplement (doi:10.1101/247197), 2020-10-27

A

Down-regulated genes overlapped with De-Rubeis et al. (FDR&lt;0.1)

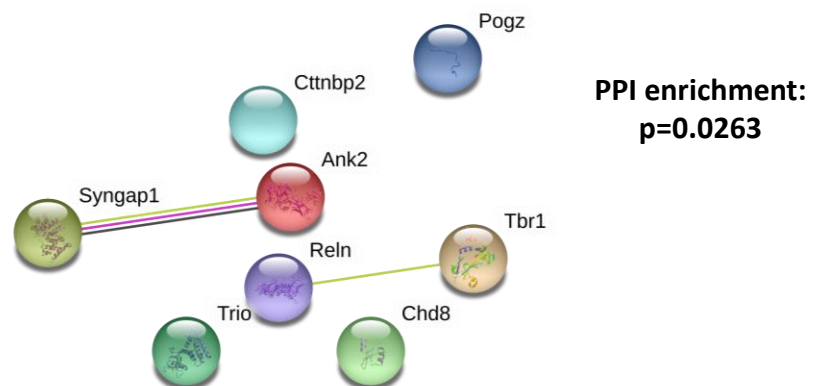

B

Down-regulated genes overlapped with De-Rubeis et al. (FDR&lt;0.3)

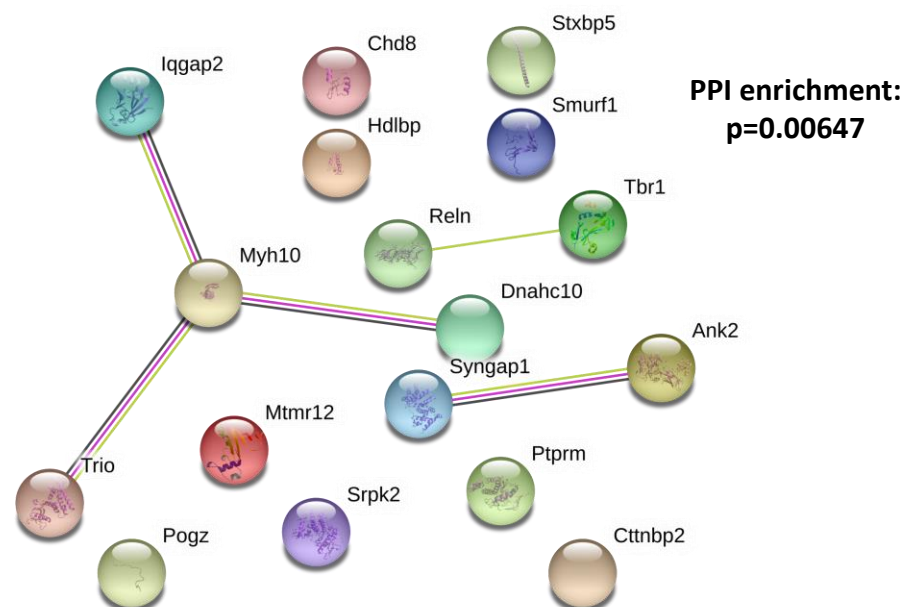

C

Up-regulated genes overlapped with SFARI-GENE dataset

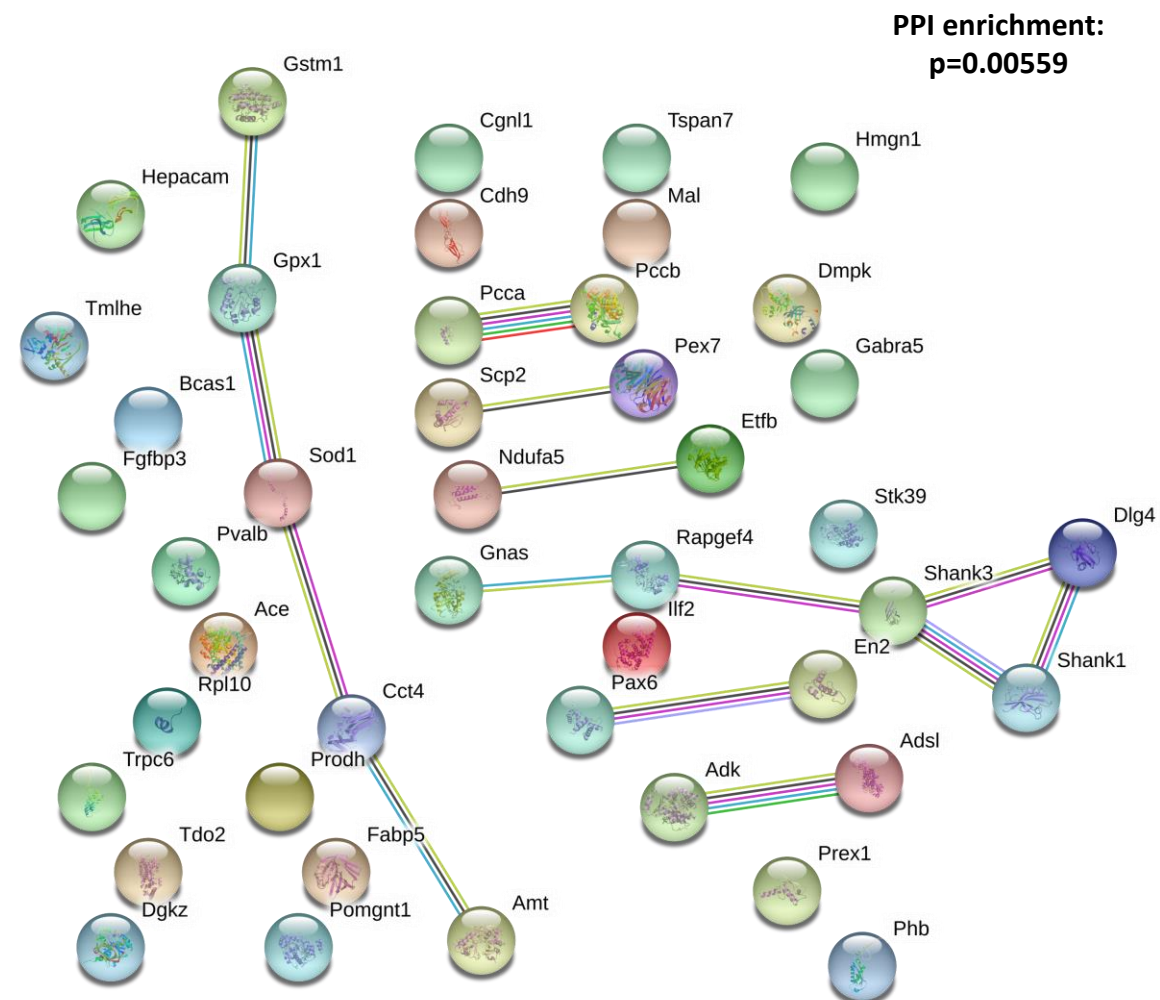

Supplement: Supplementary file [file 247197-7.pdf]
